# Supplementary material
Source: ML conference proceedings conference paper supplement (https://proceedings.mlr.press/v70/peng17a.html)
Supplement: Supplementary file 1 [file peng17a-supp.zip]

# Appendix of Distributed Asynchronous Variational Gaussian Processes

## A Derivatives

### A.1 Objective

As described in the paper, the objective function to be minimized is  $-\mathcal{L} = \sum_{i=1}^n g_i + h$ , where

$$\begin{aligned} g_i &= -\ln \mathcal{N}(y_i | \phi_i^T \boldsymbol{\mu}, \beta^{-1}) + \frac{\beta}{2} \phi_i^T \boldsymbol{\Sigma} \phi_i + \frac{\beta}{2} \tilde{k}_{ii} \\ &= \frac{1}{2} \ln 2\pi - \frac{1}{2} \ln \beta + \frac{\beta}{2} \left( y_i^2 - 2y_i \phi_i^T \boldsymbol{\mu} + \boldsymbol{\mu}^T \phi_i \phi_i^T \boldsymbol{\mu} + \phi_i^T \boldsymbol{\Sigma} \phi_i + k_{ii} - \phi_i^T \phi_i \right), \end{aligned} \quad (1)$$

$$\begin{aligned} h &= \text{KL}(q(\mathbf{w}) || p(\mathbf{w})) \\ &= \frac{1}{2} \left( -\ln |\boldsymbol{\Sigma}| - m + \text{tr}(\boldsymbol{\Sigma}) + \boldsymbol{\mu}^T \boldsymbol{\mu} \right), \end{aligned} \quad (2)$$

and we define  $\beta = \sigma^{-2}$  and  $\phi_i = \phi(\mathbf{x}_i)$ .

### A.2 Kernel

A common choice for the kernel is the anisotropic squared exponential covariance function:

$$k(\mathbf{x}_i, \mathbf{x}_j) = a_0^2 \exp \left( -\frac{1}{2} (\mathbf{x}_i - \mathbf{x}_j)^T \text{diag}(\boldsymbol{\eta}) (\mathbf{x}_i - \mathbf{x}_j) \right), \quad (3)$$

in which the hyperparameters are the signal variance  $a_0$  and the lengthscales  $\boldsymbol{\eta} = \{1/a_k^2\}_{k=1}^d$ , controlling how fast the covariance decays with the distance between inputs. Using this covariance function, we can prune input dimensions by shrinking the corresponding lengthscales based on the data (when  $\eta_d = 0$ , the  $d$ -th dimension becomes totally irrelevant to the covariance function value). This pruning is known as Automatic Relevance Determination (ARD) and therefore this covariance is also called the ARD squared exponential.

### A.3 Derivative over $\ln \sigma$ ( $\ln \beta^{-1/2}$ )

The derivative of  $g_i$  over  $\ln \sigma$  is

$$\frac{\partial g_i}{\partial \ln \sigma} = 1 - \frac{1}{\sigma^2} (y_i^2 - 2y_i \phi_i^T \boldsymbol{\mu} + \phi_i^T (\boldsymbol{\Sigma} + \boldsymbol{\mu} \boldsymbol{\mu}^T) \phi_i + k_{ii} - \phi_i^T \phi_i). \quad (4)$$

### A.4 Derivative over $\ln a_0$

The derivative of  $g_i$  over  $\ln a_0$  is

$$\frac{\partial g_i}{\partial \ln a_0} = \frac{1}{\sigma^2} (-y_i \phi_i^T \boldsymbol{\mu} + \phi_i^T (\boldsymbol{\Sigma} + \boldsymbol{\mu} \boldsymbol{\mu}^T) \phi_i + k_{ii} - \phi_i^T \phi_i). \quad (5)$$

### A.5 Derivative over $\mathbf{Z}$

By defining  $\mathbf{L}$  the lower triangular Cholesky factor of  $\mathbf{K}_{mm}^{-1}$ , the derivative of  $g_i$  over  $\mathbf{Z}$  is

$$\begin{aligned} \frac{\partial g_i}{\partial \mathbf{Z}} &= \frac{1}{\sigma^2} \left[ ((\mathbf{L} \mathbf{p}_i) \circ \mathbf{k}_m(\mathbf{x}_i)) \mathbf{x}_i^T \text{diag}(\boldsymbol{\eta}) - (((\mathbf{L} \mathbf{p}_i) \circ \mathbf{k}_m(\mathbf{x}_i)) \mathbf{1}_d^T) \circ (\mathbf{Z} \text{diag}(\boldsymbol{\eta})) \right. \\ &\quad \left. - (\mathbf{T}_i + \mathbf{T}_i^T) \mathbf{Z} \text{diag}(\boldsymbol{\eta}) + ((\mathbf{T}_i + \mathbf{T}_i^T) \mathbf{1}_m \boldsymbol{\eta}^T) \circ \mathbf{Z} \right], \end{aligned} \quad (6)$$

where

$$\mathbf{p}_i = -\boldsymbol{\mu} y_i + (\boldsymbol{\mu} \boldsymbol{\mu}^T + \boldsymbol{\Sigma}) \phi(\mathbf{x}_i) - \phi(\mathbf{x}_i), \quad (7)$$

$$\mathbf{T}_i = \left[ \mathbf{L} ((\phi(\mathbf{x}_i) \mathbf{p}_i^T) \circ \boldsymbol{\Psi}) \mathbf{L}^T \right] \circ \mathbf{K}_{mm}. \quad (8)$$

The symbol  $\circ$  denotes the Hadamard product, and  $\Psi$  is an upper triangular matrix with diagonal elements all equal to 0.5 and strictly upper triangular elements all equal to 1, as follows:

$$\Psi = \begin{bmatrix} 0.5 & 1 & \dots & 1 & 1 \\ 0 & 0.5 & \ddots & 1 & 1 \\ \vdots & \ddots & \ddots & \ddots & \vdots \\ 0 & 0 & \ddots & 0.5 & 1 \\ 0 & 0 & \dots & 0 & 0.5 \end{bmatrix}. \quad (9)$$

## A.6 Derivative over $\ln \boldsymbol{\eta}$

The derivative of  $g_i$  over  $\ln \boldsymbol{\eta}$  is

$$\begin{aligned} \frac{\partial g_i}{\partial \ln \boldsymbol{\eta}} = & \frac{1}{2\sigma^2} \left\{ 2\mathbf{1}_m^T [\mathbf{Z} \circ ((\mathbf{L}\mathbf{p}_i) \circ \mathbf{k}_m(\mathbf{x}_i)) \mathbf{x}_i^T] - \mathbf{1}_m^T ((\mathbf{L}\mathbf{p}_i) \circ \mathbf{k}_m(\mathbf{x}_i)) (\mathbf{x}_i \circ \mathbf{x}_i)^T - ((\mathbf{L}\mathbf{p}_i) \circ \mathbf{k}_m(\mathbf{x}_i))^T (\mathbf{Z} \circ \mathbf{Z}) \right. \\ & \left. - \mathbf{1}_m^T [\mathbf{Z} \circ ((\mathbf{T}_i + \mathbf{T}_i^T) \mathbf{Z})] + \mathbf{1}_m^T [(\mathbf{T}_i + \mathbf{T}_i^T)(\mathbf{Z} \circ \mathbf{Z})] \right\} \circ \boldsymbol{\eta}. \end{aligned} \quad (10)$$

## B Properties of the ELBO of ADVGP

By defining  $\mathbf{U}$  as the upper triangular Cholesky factor of  $\boldsymbol{\Sigma}$ , i.e.,  $\boldsymbol{\Sigma} = \mathbf{U}^T \mathbf{U}$ , we have

**Lemma B.1** *The gradient of  $g_i$  in Equation 1,  $\nabla g_i$ , is Lipschitz continuous with respect to each element in  $\boldsymbol{\mu}$  and  $\mathbf{U}$ .*

We can prove this by showing the first derivative of  $\nabla g_i$  with respect to each element of  $\boldsymbol{\mu}$  and  $\mathbf{U}$  is bounded, which is constant in our case. As shown in our paper, the gradients of  $g_i$  with respect to  $\boldsymbol{\mu}$  and  $\mathbf{U}$  are:

$$\frac{\partial g_i}{\partial \boldsymbol{\mu}} = \frac{1}{\sigma^2} [-y_i \boldsymbol{\phi}_i + \boldsymbol{\phi}_i \boldsymbol{\phi}_i^T \boldsymbol{\mu}], \quad (11)$$

$$\frac{\partial g_i}{\partial \mathbf{U}} = \frac{1}{\sigma^2} \text{triu}[\mathbf{U} \boldsymbol{\phi}_i \boldsymbol{\phi}_i^T], \quad (12)$$

which are affine functions for  $\boldsymbol{\mu}$  and  $\boldsymbol{\Sigma}$  respectively. Therefore, the first derivative of  $\nabla g_i$  is constant.

**Lemma B.2**  *$h$  in Equation 2 is a convex function with respect to  $\boldsymbol{\mu}$  and  $\mathbf{U}$ .*

This can be proved by verifying that the Hessian matrices of  $h$  with respect to  $\boldsymbol{\mu}$  and  $\text{vec}(\mathbf{U})$  are both positive semidefinite, where we denote  $\text{vec}(\cdot)$  as the operator that stacks the columns of a matrix as a vector. To show this, we first compute the partial derivatives of  $h$  with respect to  $\boldsymbol{\mu}$  and  $\mathbf{U}$  as

$$\frac{\partial h}{\partial \boldsymbol{\mu}} = \boldsymbol{\mu}, \quad (13)$$

$$\frac{\partial h}{\partial \mathbf{U}} = -\text{diag}(\mathbf{U}^{-1}) + \mathbf{U}. \quad (14)$$

The Hessian matrix of  $h$  with respect to  $\boldsymbol{\mu}$  is

$$\mathbf{H}(\boldsymbol{\mu}) = \mathbf{I}_{m \times m} \succeq 0. \quad (15)$$

The Hessian matrix of  $h$  with respect to  $\text{vec}(\mathbf{U})$  is

$$\mathbf{H}(\text{vec}(\mathbf{U})) = \text{diag}(\mathbf{h}) \succeq 0, \quad (16)$$

where  $\mathbf{h} = [\frac{\partial h}{\partial U_{11}^2}, \dots, \frac{\partial h}{\partial U_{1m}^2}, \dots, \frac{\partial h}{\partial U_{m1}^2}, \dots, \frac{\partial h}{\partial U_{mm}^2}]$ , and  $\frac{\partial h}{\partial U_{ij}^2} = 1 + \delta(i, j) \frac{1}{U_{i,i}^2}$ .

## C Negative Log Evidences on US Flight Data

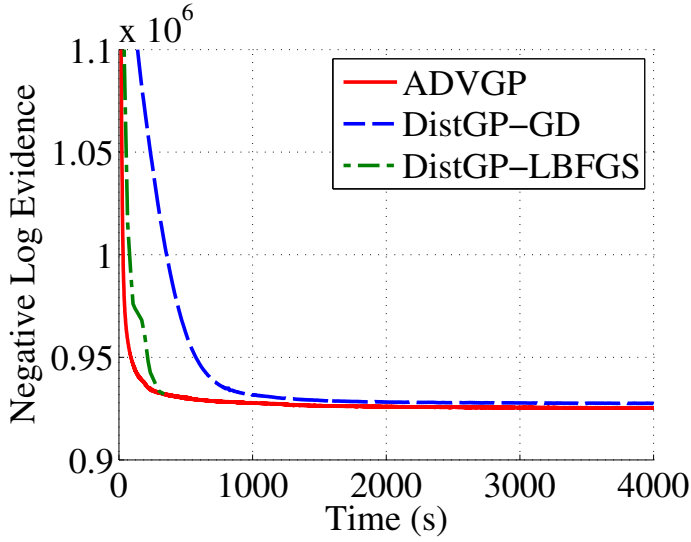

(A)  $m = 100$

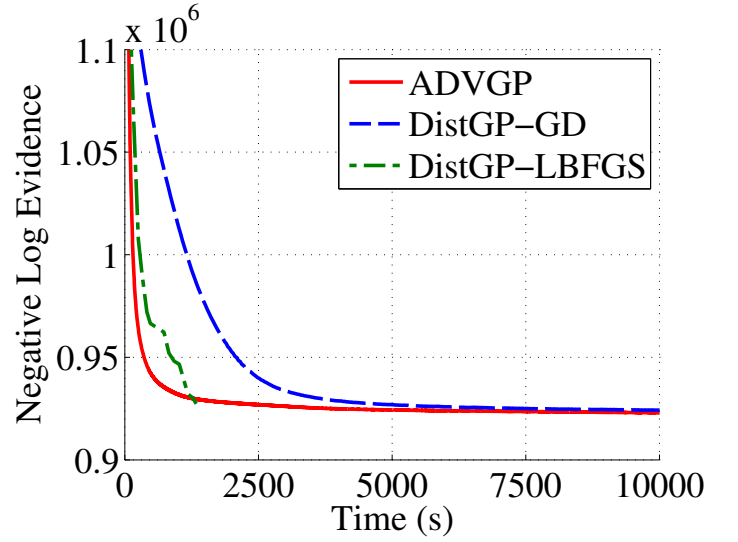

(B)  $m = 200$

Figure C.1: Negative log evidences for 700K/100K US Flight data as a function of training time.

| Method       | $m = 100$     | $m = 200$     |
|--------------|---------------|---------------|
| ADVGP        | <b>925236</b> | <b>922907</b> |
| DistGP-GD    | 927414        | 924208        |
| DistGP-LBFGS | 932179        | 927331        |

Table C.1: Negative log evidences for 700K/100K US Flight data.

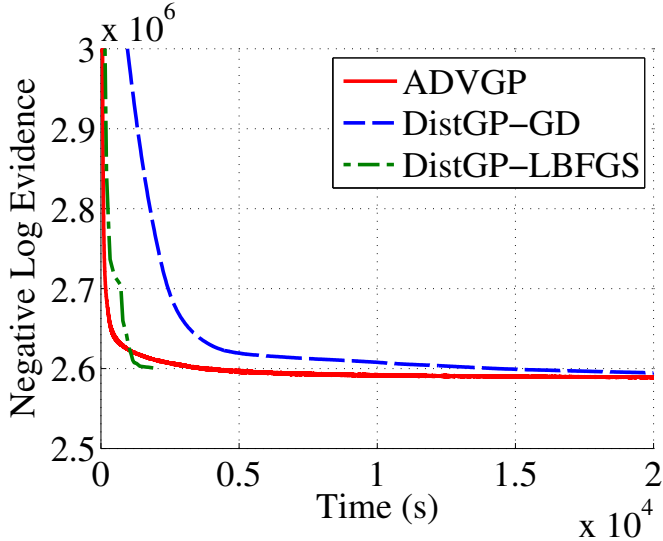

(A)  $m = 100$

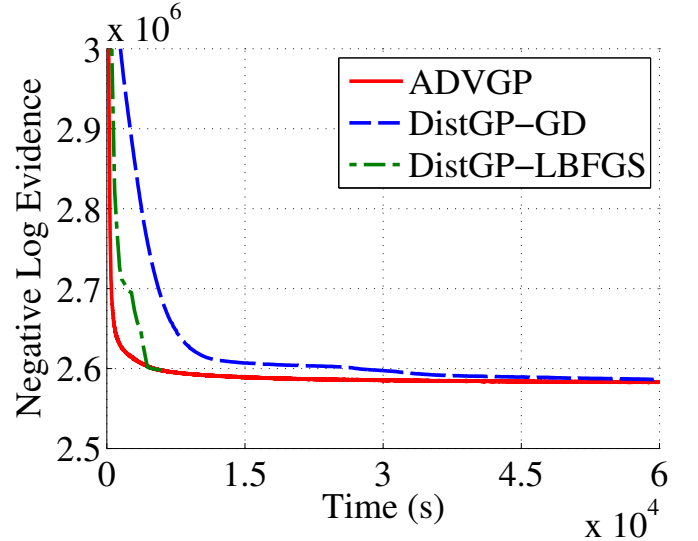

(B)  $m = 200$

Figure C.2: Negative log evidences for 2M/100K US Flight data as a function of training time.

| Method       | $m = 100$                               | $m = 200$                               |
|--------------|-----------------------------------------|-----------------------------------------|
| ADVGP        | <b><math>2.58921 \times 10^6</math></b> | <b><math>2.58267 \times 10^6</math></b> |
| DistGP-GD    | $2.59471 \times 10^6$                   | $2.58601 \times 10^6$                   |
| DistGP-LBFGS | $2.59971 \times 10^6$                   | $2.59817 \times 10^6$                   |

Table C.2: Negative log evidences for 2M/100K US Flight data.

## D Mean Negative Log Predictive Likelihoods (MNLPs) on US Flight Data

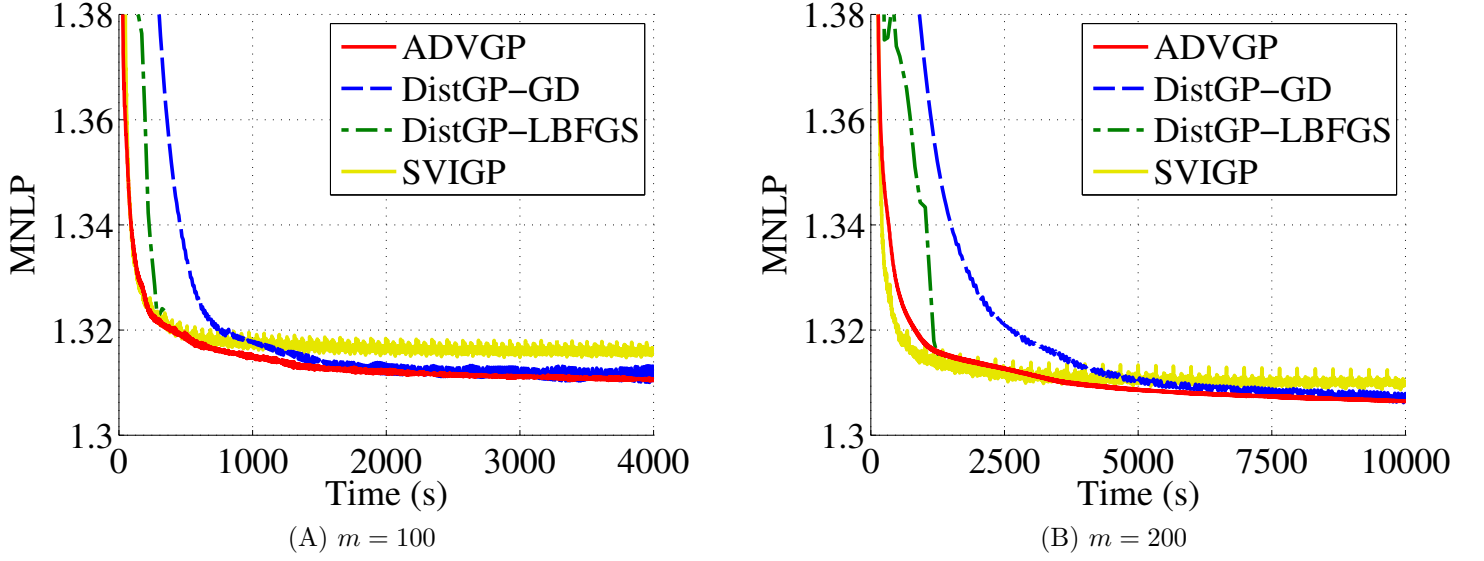

Figure D.1: Mean negative log predictive likelihoods for 700K/100K US Flight data as a function of training time.

| Method       | $m = 100$     | $m = 200$     |
|--------------|---------------|---------------|
| ADVGP        | 1.3106        | 1.3066        |
| DistGP-GD    | <b>1.3099</b> | <b>1.3062</b> |
| DistGP-LBFGS | 1.3237        | 1.3136        |
| SVIGP        | 1.3157        | 1.3096        |

Table D.1: Mean negative log predictive likelihoods for 700K/100K US Flight data.

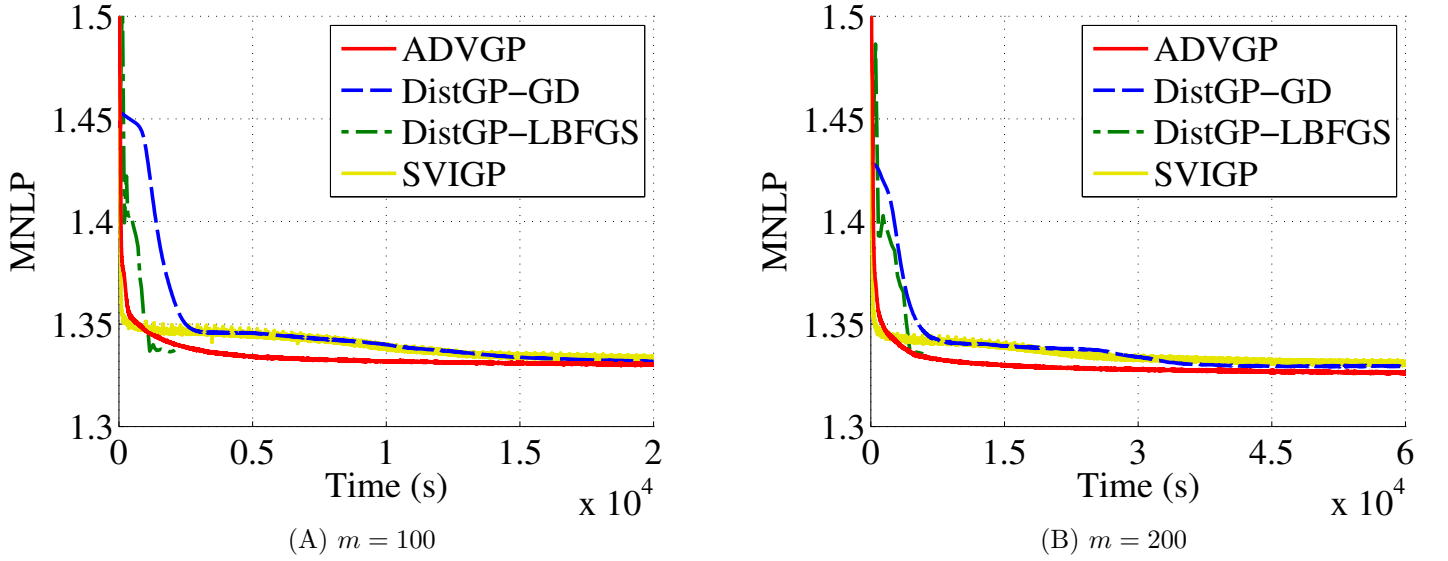

Figure D.2: Mean negative log predictive likelihoods for 2M/100K US Flight data as a function of training time.

| Method       | $m = 100$     | $m = 200$     |
|--------------|---------------|---------------|
| ADVGP        | <b>1.3301</b> | <b>1.3258</b> |
| DistGP-GD    | 1.3317        | 1.3297        |
| DistGP-LBFGS | 1.3380        | 1.3355        |
| SVIGP        | 1.3335        | 1.3306        |

Table D.2: Mean negative log predictive likelihoods for 2M/100K US Flight data.
